# Supplementary material for: HPV-Associated Gene Signatures in Bladder Cancer: A Comprehensive Prognostic Model and its Implications in Immunotherapy
Source: PubMed Central journal article supplement (PMC11659835; doi:10.7150/ijms.98334), 2025-01-01
Supplement: ijmsv22p0140s1.pdf [file ijmsv22p0140s1.pdf]

FLRT2, Belinostat

Cor=-0.534, p<0.001

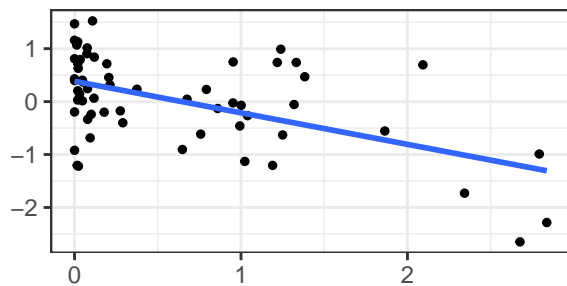

LDLR, Oxaliplatin

Cor=-0.492, p<0.001

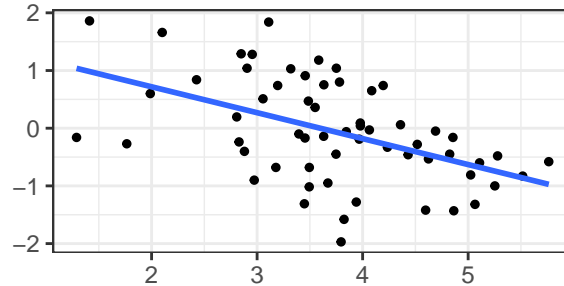

ZNF124, Nelarabine

Cor=0.476, p<0.001

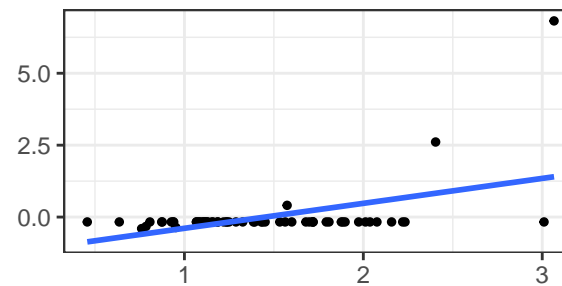

HMGA1, Fludarabine

Cor=0.464, p<0.001

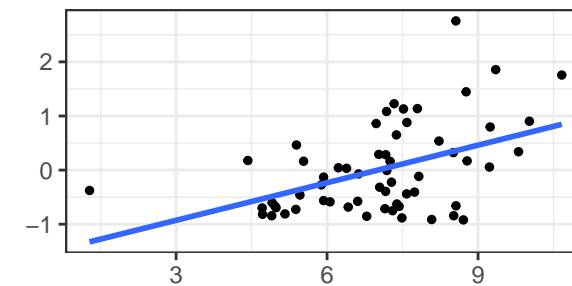

EMP1, Palbociclib

Cor=-0.449, p<0.001

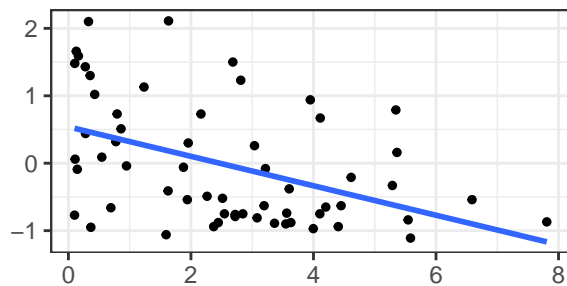

EMP1, umbralisib

Cor=-0.439, p<0.001

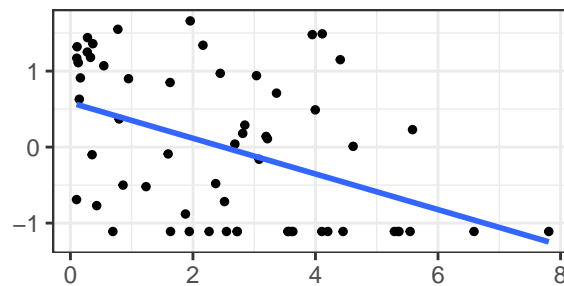

ZNF124, Palbociclib

Cor=0.438, p<0.001

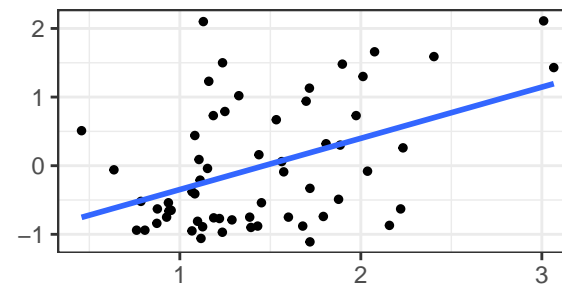

HMGA1, Cladribine

Cor=0.437, p<0.001

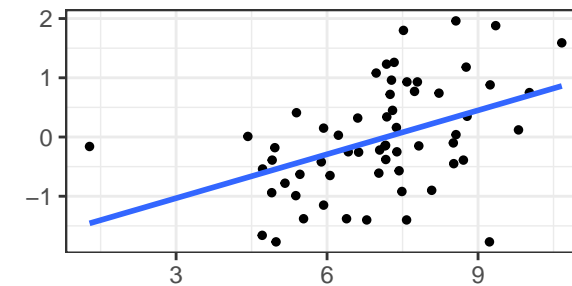

EMP1, Dexrazoxane

Cor=-0.434, p<0.001

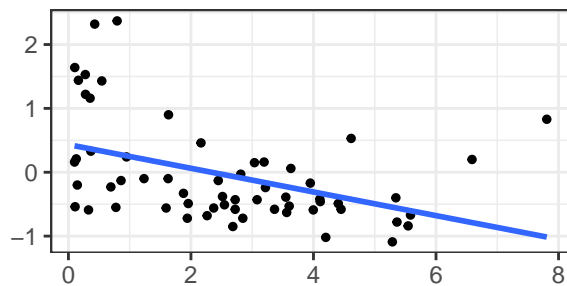

EMP1, Oxaliplatin

Cor=-0.424, p<0.001

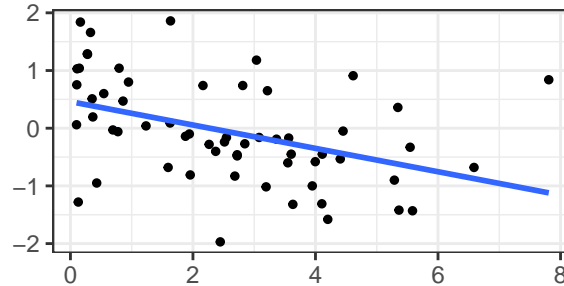

EMP1, Nitrogen mustard

Cor=-0.417, p<0.001

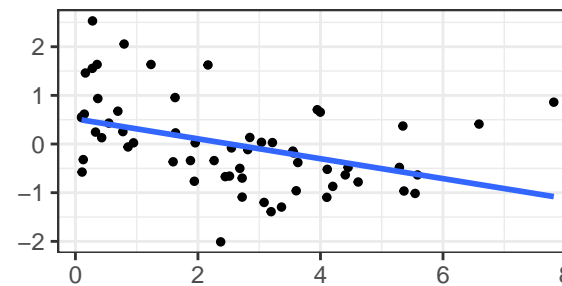

SERPINA6, Eribulin mesilate

Cor=-0.416, p<0.001

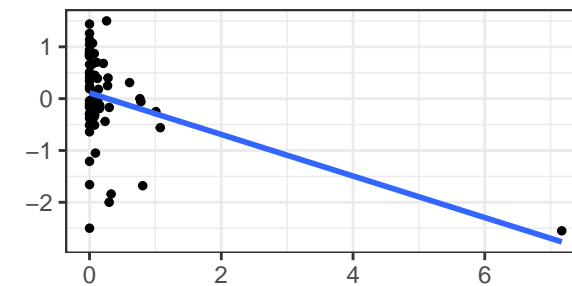

LPA, Imiquimod

Cor=0.398, p=0.002

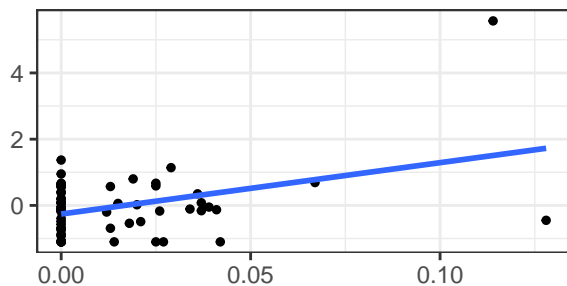

LPA, Megestrol acetate

Cor=0.394, p=0.002

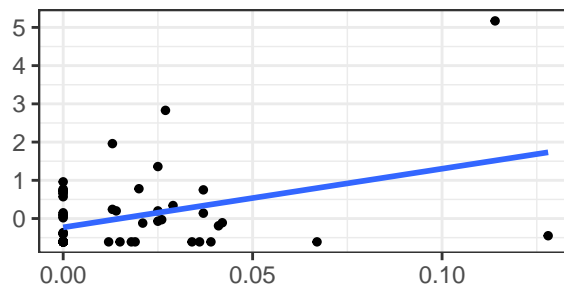

FLRT2, Palbociclib

Cor=-0.393, p=0.002

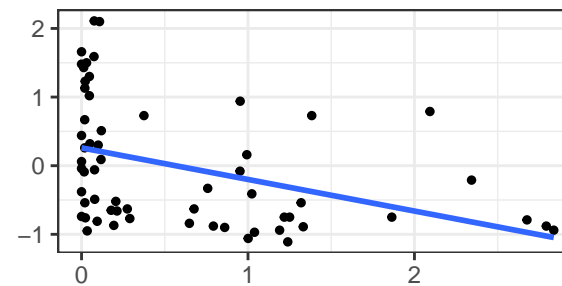

ZNF124, Ifosfamide

Cor=0.391, p=0.002

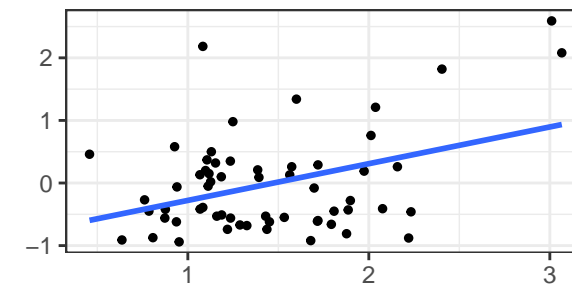

| <b>Gene name</b> | <b>Primer type</b> | <b>Primer sequence</b>  |
|------------------|--------------------|-------------------------|
| HMGA1            | Forward primer     | GCTGGTAGGGAGTCAGAAGGA   |
|                  | Reverse primer     | TGGTGGTTTTCCGGGTCTTG    |
| SCD              | Forward primer     | TCTAGCTCCTATAACCACCACCA |
|                  | Reverse primer     | TCGTCTCCAATTATCTCCTCC   |
| SCO2             | Forward primer     | ACAGGCTCTCTCAGCTCAAG    |
|                  | Reverse primer     | CAGGGCTTCTGTTCGCTTTTG   |
| LDLR             | Forward primer     | TCTGCAACATGGCTAGAGACT   |
|                  | Reverse primer     | TCCAAGCATTTCGTTGGTCCC   |
| FLRT2            | Forward primer     | CGCTGCGACAGGAACTTTG     |
|                  | Reverse primer     | TGGAGGTAGAGTACGGTTACG   |
| HOXC5            | Forward primer     | AGAGCCCCAATATCCCTGC     |
|                  | Reverse primer     | CGGTGGGAAAGTGATGCTT     |
| GRM7             | Forward primer     | ACAGGCTCTCTCAGCTCAAG    |
|                  | Reverse primer     | CAGGGCTTCTGTTCGCTTTTG   |
| EMP1             | Forward primer     | TCTGCAACATGGCTAGAGACT   |
|                  | Reverse primer     | TCCAAGCATTTCGTTGGTCCC   |
| LPA              | Forward primer     | TCCGAACAAGCACCGACTG     |
|                  | Reverse primer     | GGTCCGACTATGCGAGTGT     |
| SERPINA6         | Forward primer     | GTGAACATGAGTAACCATCACCG |
|                  | Reverse primer     | CCTGGTGGATCTCAGTCTCAG   |
| ZNF124           | Forward primer     | TGTGGGAAAGCCTTAGGTTTTT  |
|                  | Reverse primer     | ACATGGATAGGGTTCTTCACCA  |
| ETV7             | Forward primer     | CTGCTGTGGGATTACGTGTATC  |
|                  | Reverse primer     | GTTCTTGTGATTTCCCCAGAGTC |
| DSC1             | Forward primer     | AGGCTGAAACACTTGTAGGCA   |
|                  | Reverse primer     | GTTGTTCCCGTCTCTGACCAT   |

Supplementary Table. The primers used for RT-qPCR
